# Supplementary material
Source: PubMed Central journal article supplement (PMC6641499)
Supplement: ao7b01761_si_001.pdf [file ao7b01761_si_001.pdf]

## Supporting Information (SI)

### Solar Paint from TiO<sub>2</sub> Particles Supported Quantum Dots for Photoanodes in Quantum Dot-Sensitized Solar Cells

Gencai Shen,<sup>†</sup> Zhonglin Du,<sup>†</sup> Zhenxiao Pan,<sup>\*,‡</sup> Jun Du,<sup>†</sup> and Xinhua Zhong<sup>\*,†,‡</sup>

<sup>†</sup> School of Chemistry and Molecular Engineering, East China University of Science and Technology, 130 Meilong Road, Shanghai 200237, China.

<sup>‡</sup> College of Materials and Energy, South China Agricultural University, 483 Wushan Road, Guangzhou 510642, China.

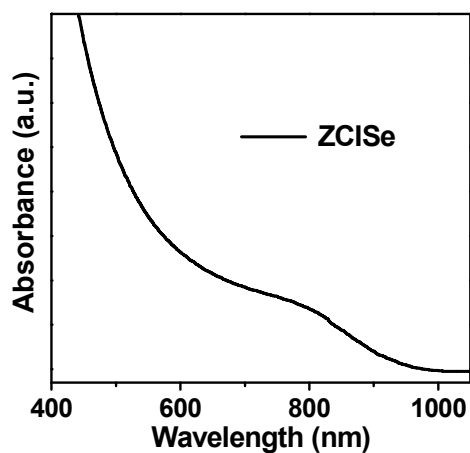

**Figure S1.** Absorption spectra of oil-soluble ZCISe QD dispersions in dichloromethane.

**Table S1.** The Individual Photovoltaic Parameters of QDSCs Corresponding to Different Contents of ZCISe QDs in the TiO<sub>2</sub> Suspension.

| Content (mg) | $V_{oc}$ (V)      | $J_{sc}$ (mA cm <sup>-2</sup> ) | FF                | PCE (%)         |
|--------------|-------------------|---------------------------------|-------------------|-----------------|
|              | 0.572             | 9.11                            | 0.628             | 3.28            |
|              | 0.578             | 9.47                            | 0.625             | 3.42            |
| 45           | 0.575             | 8.82                            | 0.636             | 3.22            |
|              | 0.577             | 9.28                            | 0.634             | 3.39            |
|              | 0.576             | 9.28                            | 0.637             | 3.40            |
| Average      | $0.576 \pm 0.002$ | $9.19 \pm 0.24$                 | $0.632 \pm 0.005$ | $3.34 \pm 0.09$ |
|              | 0.584             | 10.59                           | 0.621             | 3.83            |
|              | 0.586             | 10.88                           | 0.610             | 3.89            |
| 60           | 0.581             | 10.54                           | 0.621             | 3.80            |
|              | 0.586             | 10.44                           | 0.620             | 3.80            |
|              | 0.585             | 10.33                           | 0.627             | 3.79            |
| Average      | $0.584 \pm 0.002$ | $10.56 \pm 0.21$                | $0.620 \pm 0.006$ | $3.82 \pm 0.04$ |
|              | 0.590             | 11.28                           | 0.629             | 4.18            |
|              | 0.584             | 11.11                           | 0.623             | 4.04            |
| 75           | 0.588             | 10.81                           | 0.640             | 4.07            |
|              | 0.599             | 11.08                           | 0.634             | 4.21            |
|              | 0.589             | 11.27                           | 0.627             | 4.17            |
| Average      | $0.590 \pm 0.006$ | $11.11 \pm 0.19$                | $0.631 \pm 0.007$ | $4.13 \pm 0.07$ |
|              | 0.590             | 11.58                           | 0.626             | 4.25            |
|              | 0.599             | 11.07                           | 0.634             | 4.21            |
| 90           | 0.584             | 11.11                           | 0.627             | 4.04            |
|              | 0.583             | 10.85                           | 0.649             | 4.11            |
|              | 0.585             | 10.67                           | 0.640             | 4.00            |
| Average      | $0.588 \pm 0.007$ | $11.06 \pm 0.34$                | $0.635 \pm 0.009$ | $4.12 \pm 0.11$ |

**Table S2.** The Individual Photovoltaic Parameters of QDSCs Based on Different Thicknesses of Photoanode Film.

| Thicknesses ( $\mu\text{m}$ ) | $V_{oc}$ (V)     | $J_{sc}$ ( $\text{mA}\cdot\text{cm}^{-2}$ ) | FF               | PCE (%)        |
|-------------------------------|------------------|---------------------------------------------|------------------|----------------|
| 9                             | 0.602            | 10.18                                       | 0.610            | 3.74           |
|                               | 0.601            | 10.22                                       | 0.614            | 3.77           |
|                               | 0.601            | 9.75                                        | 0.618            | 3.62           |
|                               | 0.597            | 9.69                                        | 0.619            | 3.58           |
|                               | 0.591            | 10.09                                       | 0.613            | 3.66           |
| Average                       | $0.598\pm 0.005$ | $9.99\pm 0.25$                              | $0.615\pm 0.004$ | $3.67\pm 0.08$ |
| 12                            | 0.590            | 11.28                                       | 0.629            | 4.18           |
|                               | 0.584            | 11.11                                       | 0.623            | 4.04           |
|                               | 0.588            | 10.81                                       | 0.640            | 4.07           |
|                               | 0.599            | 11.08                                       | 0.634            | 4.21           |
|                               | 0.589            | 11.27                                       | 0.627            | 4.17           |
| Average                       | $0.590\pm 0.006$ | $11.11\pm 0.19$                             | $0.631\pm 0.007$ | $4.13\pm 0.07$ |
| 15                            | 0.582            | 9.98                                        | 0.635            | 3.69           |
|                               | 0.588            | 10.13                                       | 0.634            | 3.77           |
|                               | 0.582            | 9.82                                        | 0.644            | 3.68           |
|                               | 0.583            | 9.97                                        | 0.644            | 3.74           |
|                               | 0.589            | 10.13                                       | 0.640            | 3.82           |
| Average                       | $0.585\pm 0.003$ | $10.01\pm 0.13$                             | $0.639\pm 0.005$ | $3.74\pm 0.06$ |

**Table S3.** Photovoltaic Parameters of QDSCs Prepared with Different Contents of PVDF in the Solar Paint. The numbers in Parentheses Represent the Values Obtained from the Champion Cells.

| Content (mg) | $V_{oc}$ (V)  | $J_{sc}$ (mA cm <sup>-2</sup> ) | FF            | PCE (%)          |
|--------------|---------------|---------------------------------|---------------|------------------|
| 10           | 0.575 (0.567) | 7.80 (8.07)                     | 0.633 (0.628) | 2.85±0.08 (2.98) |
| 15           | 0.583 (0.586) | 10.19 (10.44)                   | 0.618 (0.621) | 3.68±0.08 (3.80) |
| 20           | 0.590 (0.599) | 11.11 (11.08)                   | 0.631 (0.634) | 4.13±0.07 (4.21) |
| 25           | 0.585 (0.587) | 9.99 (10.05)                    | 0.617 (0.626) | 3.61±0.06 (3.69) |
| 30           | 0.580 (0.575) | 8.99 (9.28)                     | 0.635 (0.637) | 3.31±0.08 (3.40) |

**Table S4.** Photovoltaic Parameters of the Solar Paint Based QDSCs with Active Area of 1.0 cm<sup>2</sup>.

|         | $V_{oc}$ (V)  | $J_{sc}$ (mA cm <sup>-2</sup> ) | FF            | PCE (%)     |
|---------|---------------|---------------------------------|---------------|-------------|
| 1       | 0.603         | 10.76                           | 0.612         | 3.97        |
| 2       | 0.592         | 10.14                           | 0.618         | 3.71        |
| 3       | 0.601         | 10.45                           | 0.609         | 3.82        |
| 4       | 0.606         | 10.35                           | 0.622         | 3.90        |
| 5       | 0.597         | 10.21                           | 0.615         | 3.75        |
| Average | 0.600 ± 0.005 | 10.38 ± 0.24                    | 0.615 ± 0.005 | 3.83 ± 0.11 |
